# Supplementary material
Source: PubMed Central journal article supplement (PMC4326720)
Supplement: ejhg201492x1.pdf [file ejhg201492x1.pdf]

1 **Improving molecular diagnosis in epilepsy by a dedicated high-throughput**  
2 **sequencing platform**

3 **Authors:**

4 Erika Della Mina<sup>1</sup>, Roberto Ciccone<sup>1</sup>, Francesca Brustia<sup>2</sup>, Baran Bayindir<sup>1</sup>, Ivan  
5 Limongelli<sup>2</sup>, Annalisa Vetro<sup>1</sup>, Maria Iacone<sup>3</sup>, Laura Pezzoli<sup>3</sup>, Riccardo Bellazzi<sup>4,5</sup>,  
6 Gianfranco Perotti<sup>6</sup>, Valentina De Giorgis<sup>2</sup>, Simona Lunghi<sup>2</sup>, Giangennaro Coppola<sup>7</sup>,  
7 Simona Orcesi<sup>2</sup>, Pietro Merli<sup>6</sup>, Salvatore Savasta<sup>6</sup>, Pierangelo Veggiotti<sup>2</sup>, Orsetta  
8 Zuffardi<sup>1,2</sup>

9 1: Dept. Molecular Medicine, University of Pavia, Pavia, Italy

10 2: National Neurological Institute C. Mondino, Pavia, Italy

11 3:USSD Medical Genetics Laboratory of Ospedali Riuniti, Bergamo, Italy

12 4: Dept. Industrial and Information Engineering, University of Pavia, Pavia, Italy.

13 5: IRCCS Foundation Salvatore Maugeri, Pavia, Italy.

14 6: IRCCS Foundation Policlinico San Matteo, Pavia, Italy

15 7: Child and Adolescent Neuropsychiatry, Medical School, University of Salerno, Salerno, Italy.

16

17

18 **Correspondence:** Professor O Zuffardi, Department of Molecular Medicine, University  
19 of Pavia, Via Forlanini, 14 - 27100 Pavia, Italy. Tel: +39 0382 987 733; Fax: +39 0382  
20 525 030; E-mail: zuffardi@unipv.it

21

22 **Running Title:** Molecular diagnosis in epilepsy by target NGS

23

24

## Supplementary information

### Supplementary Methods

#### Statistical test

To assess the significance of the difference in the number of variants between patient and control cohorts we applied the Wilcoxon-Mann-Whitney (WMW) non-parametric statistical test.

The choice of this statistical test is justified by i) the assumption of independence of all observations (number of variants) in both the two cohorts, ii) the discrete and ordinal nature of the variables, which hampers using parametric tests, like Student's T.

We performed the WMW test using R v.2.15.1 typing the following command:

```
wilcox.test(Cases,Controls,correct=TRUE,conf.level=0.95)
```

When Cases and Controls are two arrays reporting the number of variants for patients and controls respectively, a continuity correction factor was applied and the significance level was set to 0,05. The test was performed both two-sides and one-side, before and after discrete filtering, respectively.

Because of the discrete nature of our observations we applied ties correction for standard deviation (s1.1) to ensure that the presence of *ex-aequo* observations was not affecting results.

$$Z = \frac{(T \pm 0,5) - \mu_T}{\sigma_T}, \quad (s1.1)$$

$$\mu_T = \frac{N_1 \cdot (N_1 + N_2 + 1)}{2},$$

$$\sigma_T = \sqrt{\frac{N_1 \cdot N_2}{N \cdot (N - 1)} \cdot \left( \frac{N^3 - N}{12} - \sum_{j=1}^g \frac{t_j^3 - t_j}{12} \right)}$$

- $N_1, N_2$  are the number of patients and controls respectively
- $N = N_1 + N_2$
- $g$  is the number of ties
- $t$  is the number of observations with the same rank within each tie

## Supplementary Tables

**Table 1S** List of 67 genes included in the second version of custom epilepsy platform. The genes in bold are those in common with Lemke's platform.

| Epilepsy Platform |                |                 |
|-------------------|----------------|-----------------|
| <b>ALDH7A1</b>    | <b>ARHGEF9</b> | <b>ARX</b>      |
| CCM2              | CDKL5          | CHRNA2          |
| <b>CHRNA4</b>     | CHRNA7         | <b>CHRNA2</b>   |
| CLN8              | CNTNAP2        | <b>CSTB</b>     |
| <b>DCX</b>        | DYRK1A         | <i>EHMT1</i>    |
| EPM2A             | <b>FLNA</b>    | <b>FOXG1</b>    |
| <b>GABRA1</b>     | <b>GABRD</b>   | <b>GABRG2</b>   |
| GPR98             | <b>GRIN2A</b>  | <b>GRIN2B</b>   |
| <b>KCNJ10</b>     | <b>KCNMA1</b>  | <b>KCNQ2</b>    |
| <b>KCNQ3</b>      | <b>KCTD7</b>   | KRIT1           |
| <b>LGI1</b>       | MAGI2          | <b>MECP2</b>    |
| MEF2C             | <b>NHLRC1</b>  | <b>OPHN1</b>    |
| <b>PAFAH1B1</b>   | <b>PCDH19</b>  | PDCD10          |
| PDYN              | PLCB1          | <b>PNKP</b>     |
| <i>PNPO</i>       | <b>POLG</b>    | <b>PRICKLE1</b> |
| <b>RELN</b>       | <i>ROGDI</i>   | <b>SCARB2</b>   |
| <b>SCN1A</b>      | <b>SCN1B</b>   | <b>SCN2A</b>    |
| <b>SCN9A</b>      | SHANK3         | <b>SLC25A22</b> |
| <b>SLC2A1</b>     | <b>SLC9A6</b>  | <b>SPTAN1</b>   |
| <b>SRPX2</b>      | <b>STXBP1</b>  | SYN1            |
| <b>TBC1D24</b>    | TCF4           | <b>TSC1</b>     |
| <b>TSC2</b>       | <b>TUBA1A</b>  | <b>TUBB2B</b>   |
| <b>UBE3A</b>      |                |                 |

**Table 2S** Number of variants -single nucleotide variation (SNVs) and small indels- identified in patients and controls at different filtering steps. Each cell indicates the number of calls excluding synonymous SNVs (*a*) and eliminating those variants reported in dbSNP135, ESP with a frequency higher than 1% and already reported in-house exomes database (*b*). Taking in account only variants predicted to be deleterious at least by one prediction tool we considerably reduce the number of candidate mutations (*c*).

| <b>Variants Called</b>                |                       |                |                     |                       |                |                     |
|---------------------------------------|-----------------------|----------------|---------------------|-----------------------|----------------|---------------------|
| <b>Filter</b>                         | <b>Patient cohort</b> |                |                     | <b>Control cohort</b> |                |                     |
|                                       | <b>Total</b>          | <b>Exon/ss</b> | <b>Intron / UTR</b> | <b>Total</b>          | <b>Exon/ss</b> | <b>Intron / UTR</b> |
| <b>a) Total variants</b>              | 1036                  | 81             | 955                 | 851                   | 47             | 804                 |
| <b>b) dbSNP135*, ESP, in house db</b> | 100                   | 57             | 43                  | 55                    | 25             | 30                  |
| <b>c) Predicted damaging</b>          | 62                    | 53             | 9                   | 22                    | 17             | 5                   |

## Supplementary References

List of references for each gene included in our platform.

- ALDH7A1 Mills, P. B., Struys, E., Jakobs, C., Plecko, B., Baxter, P., Baumgartner, M., Willemsen, M. A. A. P., Omran, H., Tacke, U., Uhlenberg, B., Weschke, B., Clayton, P. T. **Mutations in antiquitin in individuals with pyridoxine-dependent seizures.** Nature Med. 12: 307-309, 2006.
- ARHGEF9 Mills, P. B., Struys, E., Jakobs, C., Plecko, B., Baxter, P., Baumgartner, M., Willemsen, M. A. A. P., Omran, H., Tacke, U., Uhlenberg, B., Weschke, B., Clayton, P. T. **Mutations in antiquitin in individuals with pyridoxine-dependent seizures.** Nature Med. 12: 307-309, 2006.
- ARX Scheffer, I. E., Wallace, R. H., Phillips, F. L., Hewson, P., Reardon, K., Parasivam, G., Stromme, P., Berkovic, S. F., Gecz, J., Mulley, J. C. **X-linked myoclonic epilepsy with spasticity and intellectual disability: mutation in the homeobox gene ARX.** Neurology 59: 348-356, 2002
- CCM2 Denier, C., Goutagny, S., Labauge, P., Krivosic, V., Arnoult, M., Cousin, A., Benabid, A. L., Comoy, J., Frerebeau, P., Gilbert, B., Houtteville, J. P., Jan, M., and 14 others. **Mutations within the MGC4607 gene cause cerebral cavernous malformations.** Am. J. Hum. Genet. 74: 326-337, 2004
- CDKL5 Elia, M., Falco, M., Ferri, R., Spalletta, A., Bottitta, M., Calabrese, G., Carotenuto, M., Musumeci, S. A., Lo Giudice, M., Fichera, M. **CDKL5 mutations in boys with severe encephalopathy and early-onset intractable epilepsy.** Neurology 71: 997-999, 2008.
- CHRNA2 Hoda JC, Wanischek M, Bertrand D, Steinlein OK. **Pleiotropic functional effects of the first epilepsy-associated mutation in the human CHRNA2 gene.** FEBS Lett. 2009 May 19;583(10):1599-604.
- CHRNA4 Hirose, S., Iwata, H., Akiyoshi, H., Kobayashi, K., Ito, M., Wada, K., Kaneko, S., Mitsudome, A. **A novel mutation of CHRNA4 responsible for autosomal dominant nocturnal frontal lobe epilepsy.** Neurology 53: 1749-1753, 1999.
- CHRNA7 Endris V, Hackmann K, Neuhaus TM, Grasshoff U, Bonin M, Haug U, Hahn G, Schallner JC, Schröck E, Tinschert S, Rappold G, Moog U. **Homozygous loss of CHRNA7 on chromosome 15q13.3 causes severe encephalopathy with seizures and hypotonia.** Am J Med Genet A. 2010 Nov;152A(11):2908-11
- CHRN2 Phillips, H. A., Favre, I., Kirkpatrick, M., Zuberi, S. M., Goudie, D., Heron, S. E., Scheffer, I. E., Sutherland, G. R., Berkovic, S. F., Bertrand, D., Mulley, J. C. **CHRN2 is the second acetylcholine receptor subunit associated with autosomal dominant nocturnal frontal lobe epilepsy.** Am. J. Hum. Genet. 68: 225-231, 2001.
- CLN8 Striano P, Specchio N, Biancheri R, Cannelli N, Simonati A, Cassandrini D, Rossi A, Bruno C, Fusco L, Gaggero R, Vigeveno F, Bertini E, Zara F, Santorelli FM, Striano S. **Clinical and electrophysiological features of epilepsy in Italian patients with CLN8 mutations.** Epilepsy Behav. 2007 Feb;10(1):187-91. Epub 2006 Nov 28.
- CNTNAP2 Stogmann E, Reinthaler E, Eltawil S, El Etribi MA, Hemeda M, El Nahhas N, Gaber AM, Fouad A, Edris S, Benet-Pages A, Eck SH, Pataria E, Mei D, Brice A, Lesage S, Guerrini R, Zimprich F, Strom TM, Zimprich A. **Autosomal recessive cortical myoclonic tremor and epilepsy: association with a mutation in the potassium channel associated gene CNTN2.** Brain. 2013 Apr;136(Pt 4):1155-60.
- CSTB Alakurtti, K., Weber, E., Rinne, R., Theil, G., de Haan, G.-J., Lindhout, D., Salmikangas, P., Saukko, P., Lahtinen, U., Lehesjoki, A.-E. **Loss of lysosomal association of cystatin B proteins representing progressive myoclonus epilepsy, EPM1, mutations.** Europ. J. Hum. Genet. 13: 208-215, 2005. Note: Erratum: Europ. J. Hum. Genet. 13: 264 only,

2005.

- DCX Gleeson, J. G., Allen, K. M., Fox, J. W., Lamperti, E. D., Berkovic, S., Scheffer, I., Cooper, E. C., Dobyns, W. B., Minnerath, S. R., Ross, M. E., Walsh, C. A. **Doublecortin, a brain-specific gene mutated in human X-linked lissencephaly and double cortex syndrome, encodes a putative signaling protein.** Cell 92: 63-72, 1998.
- DYRK1A Courcet JB, Faivre L, Malzac P, Masurel-Paulet A, Lopez E, Callier P, Lambert L, Lemesle M, Thevenon J, Gigot N, Duplomb L, Ragon C, Marle N, Mosca-Boidron AL, Huet F, Philippe C, Moncla A, Thauvin-Robinet C. **The DYRK1A gene is a cause of syndromic intellectual disability with severe microcephaly and epilepsy.** J Med Genet. 2012 Dec;49(12):731-6
- EHMT1 Kleefstra T, van Zelst-Stams WA, Nillesen WM, Cormier-Daire V, Houge G, Foulds N, van Dooren M, Willemsen MH, Pfundt R, Turner A, Wilson M, McGaughran J, Rauch A, Zenker M, Adam MP, Innes M, Davies C, López AG, Casalone R, Weber A, Brueton LA, Navarro AD, Bralo MP, Venselaar H, Stegmann SP, Yntema HG, van Bokhoven H, Brunner HG. **Further clinical and molecular delineation of the 9q subtelomeric deletion syndrome supports a major contribution of EHMT1 haploinsufficiency to the core phenotype.**J Med Genet. 2009 Sep;46(9):598-606.
- EPM2A Gomez-Garre, P., Sanz, Y., Rodriguez de Cordoba, S., Serratosa, J. M. **Mutational spectrum of the EPM2A gene in progressive myoclonus epilepsy of Lafora: high degree of allelic heterogeneity and prevalence of deletions.** Europ. J. Hum. Genet. 8: 946-954, 2000.
- FLNA Clapham KR, Yu TW, Ganesh VS, Barry B, Chan Y, Mei D, Parrini E, Funalot B, Dupuis L, Nezarati MM, du Souich C, van Karnebeek C, Guerrini R, Walsh CA. **FLNA genomic rearrangements cause periventricular nodular heterotopia.** Neurology. 2012 Jan 24;78(4):269-78.
- FOXP1 Brunetti-Pierri N, Paciorkowski AR, Ciccone R, Della Mina E, Bonaglia MC, Borgatti R, Schaaf CP, Sutton VR, Xia Z, Jelluma N, Ruivenkamp C, Bertrand M, de Ravel TJ, Jayakar P, Belli S, Rocchetti K, Pantaleoni C, D'Arrigo S, Hughes J, Cheung SW, Zuffardi O, Stankiewicz P. **Duplications of FOXP1 in 14q12 are associated with developmental epilepsy, mental retardation, and severe speech impairment.** Eur J Hum Genet. 2011 Jan;19(1):102-7.
- GABRA1 Gurba KN, Hernandez CC, Hu N, Macdonald RL. **GABRB3 mutation, G32R, associated with childhood absence epilepsy alters  $\alpha 1\beta 3\gamma 2L$   $\gamma$ -aminobutyric acid type A (GABAA) receptor expression and channel gating.** J Biol Chem. 2012 Apr 6;287(15):12083-97.
- GABRD Dibbens, L. M., Feng, H.-J., Richards, M. C., Harkin, L. A., Hodgson, B. L., Scott, D., Jenkins, M., Petrou, S., Sutherland, G. R., Scheffer, I. E., Berkovic, S. F., Macdonald, R. L., Mulley, J. C. **GABRD encoding a protein for extra- or peri-synaptic GABA-A receptors is a susceptibility locus for generalized epilepsies.** Hum. Molec. Genet. 13: 1315-1319, 2004.
- GABRG2 Wallace, R. H., Marini, C., Petrou, S., Harkin, L. A., Bowser, D. N., Panchal, R. G., Williams, D. A., Sutherland, G. R., Mulley, J. C., Scheffer, I. E., Berkovic, S. F. **Mutant GABA(A) receptor gamma-2-subunit in childhood absence epilepsy and febrile seizures.** Nature Genet. 28: 49-52, 2001.
- GPR98 Engels H, Wohlleber E, Zink A, Hoyer J, Ludwig KU, Brockschmidt FF, Wiczorek D, Moog U, Hellmann-Mersch B, Weber RG, Willatt L, Kreiss-Nachtsheim M, Firth HV, Rauch A. **A novel microdeletion syndrome involving 5q14.3-q15: clinical and molecular cytogenetic characterization of three patients.** Eur J Hum Genet. 2009 Dec;17(12):1592-9.

- GRIN2A Endele, S., Rosenberger, G., Geider, K., Popp, B., Tamer, C., Stefanova, I., Milh, M.,  
GRIN2B Kortum, F., Fritsch, A., Pientka, F. K., Hellenbroich, Y., Kalscheuer, V. M., and 16  
others. **Mutations in GRIN2A and GRIN2B encoding regulatory subunits of  
NMDA receptors cause variable neurodevelopmental phenotypes.** Nature Genet. 42:  
1021-1026, 2010.
- KCNJ10 Reichold M, Zdebik AA, Lieberer E, Rapedius M, Schmidt K, Bandulik S, Sterner C,  
Tegtmeier I, Penton D, Baukrowitz T, Hulton SA, Witzgall R, Ben-Zeev B, Howie AJ,  
Kleta R, Bockenhauer D, Warth R. **KCNJ10 gene mutations causing EAST  
syndrome (epilepsy, ataxia, sensorineural deafness, and tubulopathy) disrupt  
channel function.** Proc Natl Acad Sci U S A. 2010 Aug 10;107(32):14490-5. doi:  
10.1073/pnas.1003072107. Epub 2010 Jul 22.
- KCNMA1 Du, W., Bautista, J. F., Yang, H., Diez-Sampedro, A., You, S.-A., Wang, L., Kotagal, P.,  
Luders, H. O., Shi, J., Cui, J., Richerson, G. B., Wang, Q. K. **Calcium-sensitive potassium  
channelopathy in human epilepsy and paroxysmal movement disorder.** Nature  
Genet. 37: 733-738, 2005.
- KCNQ2 Dedek, K., Fusco, L., Teloy, N., Steinlein, O. K. **Neonatal convulsions and epileptic  
encephalopathy in an Italian family with a missense mutation in the fifth  
transmembrane region of KCNQ2.** Epilepsy Res. 54: 21-27, 2003.
- KCNQ3 Otto JF, Singh NA, Dahle EJ, Leppert MF, Pappas CM, Pruess TH, Wilcox KS, White  
HS. **Electroconvulsive seizure thresholds and kindling acquisition rates are altered  
in mouse models of human KCNQ2 and KCNQ3 mutations for benign familial  
neonatal convulsions.** Epilepsia. 2009 Jul;50(7):1752-9.
- KCTD7 Kousi, M., Anttila, V., Schulz, A., Calafato, S., Jakkula, E., Riesch, E., Myllykangas, L.,  
Kalimo, H., Topcu, M., Gokben, S., Alehan, F., Lemke, J. R., Alber, M., Palotie, A.,  
Kopra, O., Lehesjoki, A.-E. **Novel mutations consolidate KCTD7 as a progressive  
myoclonus epilepsy gene.** J. Med. Genet. 49: 391-399, 2012.
- KRIT1 Cave-Riant, F., Denier, C., Labauge, P., Cecillon, M., Maciazek, J., Joutel, A., Laberge-le  
Couteulx, S., Tournier-Lasserre, E., Societe Francaise de Neurochirurgie. **Spectrum  
and expression analysis of KRIT1 mutations in 121 consecutive and unrelated  
patients with cerebral cavernous malformations.** Europ. J. Hum. Genet. 10: 733-740,  
2002.
- LGI1 Fertig, E., Lincoln, A., Martinuzzi, A., Mattson, R. H., Hisama, F. M. **Novel LGI1  
mutation in a family with autosomal dominant partial epilepsy with auditory  
features.** Neurology 60: 1687-1690, 2003.
- MAGI2 Marshall, C. R., Young, E. J., Pani, A. M., Freckmann, M.-L., Lacassie, Y., Howald, C.,  
Fitzgerald, K. K., Peippo, M., Morris, C. A., Shane, K., Priolo, M., Morimoto, M., and 13  
others. **Infantile spasms is associated with deletion of the MAGI2 gene on  
chromosome 7q11.23-q21.11.** Am. J. Hum. Genet. 83: 106-111, 2008.
- MECP2 Amir, R. E., Van den Veyver, I. B., Wan, M., Tran, C. Q., Francke, U., Zoghbi, H. Y.  
**Rett syndrome is caused by mutations in X-linked MECP2, encoding methyl-CpG-  
binding protein 2.** Nature Genet. 23: 185-188, 1999.
- MEF2C Novara F, Rizzo A, Bedini G, Girgenti V, Esposito S, Pantaleoni C, Ciccone R, Sciacca  
FL, Achille V, Della Mina E, Gana S, Zuffardi O, Estienne M. **MEF2C deletions and  
mutations versus duplications: a clinical comparison.** Eur J Med Genet. 2013  
May;56(5):260-5.
- NHLRC1 Chan, E. M., Young, E. J., Ianzano, L., Munteanu, I., Zhao, X., Christopoulos, C. C.,  
Avanzini, G., Elia, M., Ackerley, C. A., Jovic, N. J., Bohlega, S., Andermann, E., Rouleau,  
G. A., Delgado-Escueta, A. V., Minassian, B. A., Scherer, S. W. **Mutations in NHLRC1  
cause progressive myoclonus epilepsy.** Nature Genet. 35: 125-127, 2003.



- OPHN1 Bergmann, C., Zerres, K., Senderek, J., Rudnik-Schoneborn, S., Eggermann, T., Hausler, M., Mull, M., Ramaekers, V. T. **Oligophrenin 1 (OPHN1) gene mutation causes syndromic X-linked mental retardation with epilepsy, rostral ventricular enlargement and cerebellar hypoplasia.** Brain 126: 1537-1544, 2003.
- PAFAH1B1 Cardoso, C., Leventer, R. J., Dowling, J. J., Ward, H. L., Chung, J., Petras, K. S., Roseberry, J. A., Weiss, A. M., Das, S., Martin, C. L., Pilz, D. T., Dobyns, W. B., Ledbetter, D. H. **Clinical and molecular basis of classical lissencephaly: mutations in the LIS1 gene (PAFAH1B1).** Hum. Mutat. 19: 4-15, 2002.
- PCDH19 Dibbens, L. M., Tarpey, P. S., Hynes, K., Bayly, M. A., Scheffer, I. E., Smith, R., Bomar, J., Sutton, E., Vandeleur, L., Shoubbridge, C., Edkins, S., Turner, S. J., and 45 others. **X-linked protocadherin 19 mutations cause female-limited epilepsy and cognitive impairment.** Nature Genet. 40: 776-781, 2008.
- PDCD10 Lee ST, Choi KW, Yeo HT, Kim JW, Ki CS, Cho YD. **Identification of an Arg35X mutation in the PDCD10 gene in a patient with cerebral and multiple spinal cavernous malformations.** J Neurol Sci. 2008 Apr 15;267(1-2):177-81.
- PDYN Stögmann E, Zimprich A, Baumgartner C, Aull-Watschinger S, Höllt V, Zimprich F. **A functional polymorphism in the prodynorphin gene promotor is associated with temporal lobe epilepsy.** Ann Neurol. 2002 Feb;51(2):260-3.
- PLCB1 Kurian, M. A., Meyer, E., Vassallo, G., Morgan, N. V., Prakash, N., Pasha, S., Hai, N. A., Shuib, S., Rahman, F., Wassmer, E., Cross, J. H., O'Callaghan, F. J., Osborne, J. P., Scheffer, I. E., Gissen, P., Maher, E. R. **Phospholipase C beta 1 deficiency is associated with early-onset epileptic encephalopathy.** Brain 133: 2964-2970, 2010.
- PNKP Shen, J., Gilmore, E. C., Marshall, C. A., Haddadin, M., Reynolds, J. J., Eyaid, W., Bodell, A., Barry, B., Gleason, D., Allen, K., Ganesh, V. S., Chang, B. S., Grix, A., Hill, R. S., Topcu, M., Caldecott, K. W., Barkovich, A. J., Walsh, C. A. **Mutations in PNKP cause microcephaly, seizures and defects in DNA repair.** (Letter) Nature Genet. 42: 245-249, 2010.
- PNPO Mills, P. B., Surtees, R. A. H., Champion, M. P., Beesley, C. E., Dalton, N., Scambler, P. J., Heales, S. J. R., Briddon, A., Schmeimberg, I., Hoffmann, G. F., Zschocke, J., Clayton, P. T. **Neonatal epileptic encephalopathy caused by mutations in the PNPO gene encoding pyridox(am)ine 5-prime-phosphate oxidase.** Hum. Molec. Genet. 14: 1077-1086, 2005.
- POLG Winterthun S, Ferrari G, He L, Taylor RW, Zeviani M, Turnbull DM, Engelsens BA, Moen G, Bindoff LA. **Autosomal recessive mitochondrial ataxic syndrome due to mitochondrial polymerase gamma mutations.** Neurology. 2005 Apr 12;64(7):1204-8.
- PRICKLE1 Bassuk, A. G., Wallace, R. H., Buhr, A., Buller, A. R., Afawi, Z., Shimojo, M., Miyata, S., Chen, S., Gonzalez-Alegre, P., Griesbach, H. L., Wu, S., Nashelsky, M., and 18 others. **A homozygous mutation in human PRICKLE1 causes an autosomal-recessive progressive myoclonus epilepsy-ataxia syndrome.** Am. J. Hum. Genet. 83: 572-581, 2008.
- RELN Zaki, M., Shehab, M., El-Aleem, A. A., Abdel-Salam, G., Koeller, H. B., Ilkin, Y., Ross, M. E., Dobyns, W. B., Gleeson, J. G. **Identification of a novel recessive RELN mutation using a homozygous balanced reciprocal translocation.** Am. J. Med. Genet. 143A: 939-944, 2007.
- ROGDI Tucci, A., Kara, E., Schossig, A., Wolf, N. I., Plagnol, V., Fawcett, K., Paisan-Ruiz, C., Moore, M., Hernandez, D., Musumeci, S., Tennison, M., Hennekam, R., and 19 others. **Kohlschütter-Tonz syndrome: mutations in ROGDI and evidence of genetic heterogeneity.** Hum. Mutat. 34: 296-300, 2013.

- SCARB2 Dibbens, L. M., Karakis, I., Bayly, M. A., Costello, D. J., Cole, A. J., Berkovic, S. F. **Mutation of SCARB2 in a patient with progressive myoclonus epilepsy and demyelinating peripheral neuropathy.** Arch. Neurol. 68: 812-813, 2011.
- SCN1A Escayg A, MacDonald BT, Meisler MH, Baulac S, Huberfeld G, An-Gourfinkel I, Brice A, LeGuern E, Moulard B, Chaigne D, Buresi C, Malafosse A. **Mutations of SCN1A, encoding a neuronal sodium channel, in two families with GEFS+2.** Nat Genet. 2000 Apr;24(4):343-5.
- SCN1B Wallace, R. H., Scheffer, I. E., Parasivam, G., Barnett, S., Wallace, G. B., Sutherland, G. R., Berkovic, S. F., Mulley, J. C. **Generalized epilepsy with febrile seizures plus: mutation of the sodium channel subunit SCN1B.** Neurology 58: 1426-1429, 2002.
- SCN2A Ogiwara, I., Ito, K., Sawaisi, Y., Osaka, H., Mazaki, E., Inoue, I., Montal, M., Hashikawa, T., Shike, T., Fujiwara, T., Inoue, Y., Kaneda, M., Yamakawa, K. **De novo mutations of voltage-gated sodium channel alpha-II gene SCN2A in intractable epilepsies.** Neurology 73: 1046-1053, 2009.
- SCN9A Mulley JC, Hodgson B, McMahon JM, Iona X, Bellows S, Mullen SA, Farrell K, Mackay M, Sadleir L, Bleasel A, Gill D, Webster R, Wirrell EC, Harbord M, Sisodiya S, Andermann E, Kivity S, Berkovic SF, Scheffer IE, Dibbens LM. **Role of the sodium channel SCN9A in genetic epilepsy with febrile seizures plus and Dravet syndrome.** Epilepsia. 2013 Sep;54(9):e122-6.
- SHANK3 Chen CP, Lin SP, Chern SR, Tsai FJ, Wu PC, Lee CC, Chen YT, Chen WL, Wang W. **A de novo 7.9 Mb deletion in 22q13.2→qter in a boy with autistic features, epilepsy, developmental delay, atopic dermatitis and abnormal immunological findings.** Eur J Med Genet. 2010 Sep-Oct;53(5):329-32.
- SLC25A22 Molinari, F., Kaminska, A., Fiermonte, G., Boddaert, N., Raas-Rothschild, A., Plouin, P., Palmieri, L., Brunelle, F., Palmieri, F., Dulac, O., Munnich, A., Colleaux, L. **Mutations in the mitochondrial glutamate carrier SLC25A22 in neonatal epileptic encephalopathy with suppression bursts.** Clin. Genet. 76: 188-194, 2009.
- SLC2A1 Muhle H, Helbig I, Frøslev TG, Suls A, von Spiczak S, Klitten LL, Dahl HA, Brusgaard K, Neubauer B, De Jonghe P, Tommerup N, Stephani U, Hjalgrim H, Møller RS. **The role of SLC2A1 in early onset and childhood absence epilepsies.** Epilepsy Res. 2013 Jul;105(1-2):229-33.
- SLC9A6 Gilfillan, G. D., Selmer, K. K., Roxrud, I., Smith, R., Kyllerman, M., Eiklid, K., Kroken, M., Mattingsdal, M., Egeland, T., Stenmark, H., Sjöholm, H., Server, A., and 15 others. **SLC9A6 mutations cause X-linked mental retardation, microcephaly, epilepsy, and ataxia, a phenotype mimicking Angelman syndrome.** Am. J. Hum. Genet. 82: 1003-1010, 2008.
- SPTAN1 Saitsu, H., Tohyama, J., Kumada, T., Egawa, K., Hamada, K., Okada, I., Mizuguchi, T., Osaka, H., Miyata, R., Furukawa, T., Haginoya, K., Hoshino, H., and 15 others. **Dominant-negative mutations in alpha-II spectrin cause West syndrome with severe cerebral hypomyelination, spastic quadriplegia, and developmental delay.** Am. J. Hum. Genet. 86: 881-891, 2010.
- SRPX2 Royer-Zemmour, B., Ponsolle-Lenfant, M., Gara, H., Roll, P., Leveque, C., Massacrier, A., Ferracci, G., Cillario, J., Robaglia-Schlupp, A., Vincentelli, R., Cau, P., Szeppetowski, P. **Epileptic and developmental disorders of the speech cortex: ligand/receptor interaction of wild-type and mutant SRPX2 with the plasminogen activator receptor uPAR.** Hum. Molec. Genet. 17: 3617-3630, 2008.
- STXBP1 Saitsu, H., Kato, M., Mizuguchi, T., Hamada, K., Osaka, H., Tohyama, J., Uruno, K., Kumada, S., Nishiyama, K., Nishimura, A., Okada, I., Yoshimura, Y., Hirai, S., Kumada,

- T., Hayasaka, K., Fukuda, A., Ogata, K., Matsumoto, N. **De novo mutations in the gene encoding STXBP1 (MUNC18-1) cause early infantile epileptic encephalopathy.** Nature Genet. 40: 782-788, 2008.
- SYN1 Garcia, C. C., Blair, H. J., Seager, M., Coulthard, A., Tennant, S., Buddles, M., Curtis, A., Goodship, J. A. **Identification of a mutation in synapsin I, a synaptic vesicle protein, in a family with epilepsy.** J. Med. Genet. 41: 183-187, 2004.
- TBC1D24 Corbett, M. A., Bahlo, M., Jolly, L., Afawi, Z., Gardner, A. E., Oliver, K. L., Tan, S., Coffey, A., Mulley, J. C., Dibbens, L. M., Simri, W., Shalata, A., Kivity, S., Jackson, G. D., Berkovic, S. F., Gecz, J. **A focal epilepsy and intellectual disability syndrome is due to a mutation in TBC1D24.** Am. J. Hum. Genet. 87: 371-375, 2010.
- TCF4 Rosenfeld, J. A., Leppig, K., Ballif, B. C., Thiese, H., Erdie-Lalena, C., Bawle, E., Sastry, S., Spence, J. E., Bandholz, A., Surti, U., Zonana, J., Keller, K., Meschino, W., Bejjani, B. A., Torchia, B. S., Shaffer, L. G. **Genotype-phenotype analysis of TCF4 mutations causing Pitt-Hopkins syndrome shows increased seizure activity with missense mutations.** Genet. Med. 11: 797-805, 2009.
- TSC1 Jones, A. C., Daniells, C. E., Snell, R. G., Tachataki, M., Idziaszczyk, S. A., Krawczak, M., TSC2 Sampson, J. R., Cheadle, J. P. **Molecular genetic and phenotypic analysis reveals differences between TSC1 and TSC2 associated familial and sporadic tuberous sclerosis.** Hum. Molec. Genet. 6: 2155-2161, 1997.
- TUBA1A Jansen, A. C., Oostra, A., Desprechins, B., De Vlaeminck, Y., Verhelst, H., Regal, L., Verloo, P., Bockaert, N., Keymolen, K., Seneca, S., De Meirleir, L., Lissens, W. **TUBA1A mutations: from isolated lissencephaly to familial polymicrogyria.** Neurology 76: 988-992, 2011.
- TUBB2B Guerrini, R., Mei, D., Cordelli, D. M., Pucatti, D., Franzoni, E., Parrini, E. **Symmetric polymicrogyria and pachygyria associated with TUBB2B gene mutations.** Europ. J. Hum. Genet. 20: 995-998, 2012.
- UBE3A Pelc K, Boyd SG, Cheron G, Dan B. **Epilepsy in Angelman syndrome.** Seizure. 2008 Apr;17(3):211-7.
